# Supplementary material
Source: PubMed Central journal article supplement (PMC3164187)
Supplement: mmc1.pdf [file mmc1.pdf]

Supplementary Material for The binding process of a non-specific sequence enzyme  
with DNA

Chuanying Chen<sup>1</sup> and B. Montgomery Pettitt<sup>1</sup>

<sup>1</sup>Department of Chemistry  
University of Houston  
Houston, TX 77204-5003, USA

## Computational details

The desolvation energy of the protein (DNA), due to the presence of DNA (protein), may be approximated (1) as

$$\Delta G_{ds,BD} = \alpha \frac{\varepsilon_{out} - \varepsilon_{in}}{\varepsilon_{out} (2\varepsilon_{out} + \varepsilon_{in})} \sum_{ij} (1 + \kappa r_{ij})^2 e^{-2\kappa r_{ij}} \frac{q_i^2 a_j^3}{r_{ij}^4}, \quad (1)$$

where  $\alpha$  is the scaling factor and is set to 1.67 from Wade (2),  $\kappa$  is the Debye-Hückel screening parameter,  $q_i$  is the effective charge on the  $i$ th atom of the protein (DNA),  $a_j$  is the radius of the  $j$ th atom of the DNA (protein), and  $r_{ij}$  is the distance between the two atoms. The summation is carried out over all possible pairs of effective charges on the protein (DNA) with atoms on the DNA (protein).

Translational and rotational diffusion constant of the protein,  $D_{T,pro}$  and  $D_{R,pro}$  are estimated to be  $0.0132 \text{ \AA}^2/\text{ps}$  and  $3.572 \times 10^{-5} \text{ radian}^2/\text{ps}$ , respectively, by using the Stokes-Einstein relation and

$$\text{assuming a spherical shape: } D_{T,pro} = \frac{k_B T}{6\pi\eta R}, \quad D_{R,pro} = \frac{k_B T}{8\pi\eta R^3},$$

where  $\eta$  is the viscosity of the solvent at  $T = 300 \text{ K}$ , and  $R$  is the effective hydrodynamic radius of the protein. The translational and rotational diffusion constant of the DNA,  $D_{T,DNA}$  and  $D_{R,DNA}$ , are estimated to be  $0.01376 \text{ \AA}^2/\text{ps}$  and  $2.8445 \times 10^{-5} \text{ radian}^2/\text{ps}$ , respectively, by modeling the short fragment of DNA as a rod (3),

$$D_{T,DNA} = \frac{k_B T}{3\pi\eta L} \left( \ln \frac{L}{d} + \nu \right), \text{ with } \nu = 0.312 + 0.565 \left( \frac{L}{d} \right)^{-1} - 0.100 \left( \frac{L}{d} \right)^{-2}, \quad (2)$$

$$D_{R,DNA} = \frac{3k_B T}{\pi\eta L^3} \left( \ln \frac{L}{d} + \delta \right), \text{ with } \delta = -0.662 + 0.917 \left( \frac{L}{d} \right)^{-1} - 0.050 \left( \frac{L}{d} \right)^{-2}, \quad (3)$$

where  $L = 40.8 \text{ \AA}$  and  $d = 20.0 \text{ \AA}$  are the length and diameter of the rod, respectively. Here  $\left( \ln \frac{L}{d} + \nu \right)$

and  $\left( \ln \frac{L}{d} + \delta \right)$  are the traditional end effect corrections.

## References

1. Elcock, A.H., R.R. Gabdouliline, R.C. Wade, and J.A. McCammon. 1999. Computer simulation of protein-protein association kinetics: acetylcholinesterase-fasciculin. *J. Mol. Biol.* 291:149-162.
2. Gabdouliline, R.R., and R.C. Wade. 2001. Protein-protein association: Investigation of factors influencing association rates by Brownian Dynamics simulations. *J. Mol. Biol.*, 306:1139-1155.
3. Tirado, M.M., C.L. Mainez, and J.G. de la Torre. 1984. Comparison of theories for the translational and rotational diffusion coefficients of rod-like macromolecules. Application to short DNA fragments. *J. Chem. Phys.* 4:2047-2052.

**Supplementary Table**

| Model II               |            |       |       |           |       |            |             |
|------------------------|------------|-------|-------|-----------|-------|------------|-------------|
|                        | $d_{\min}$ | r     | z     | $\varphi$ | $r_p$ | $\theta_p$ | $\varphi_p$ |
|                        | (Å)        | (Å)   | (Å)   | (°)       | (Å)   | (°)        | (°)         |
| initial                | 13.5       | 36.5  | 0.0   | 0.0       | 10.6  | 152.3      | 0.0         |
| approach (~350 ps)     | 4.4        | 26.0  | -8.7  | -18.0     | 11.1  | 143.1      | -35.3       |
| encounter (~3 ns)      | 2.6        | 20.2  | 0.17  | -3.7      | 10.9  | 125.2      | 1.9         |
| association (50~100ns) | 2.6        | 22.5  | -0.3  | 0.1       | 11.0  | 111.2      | -7.4        |
|                        | (0.1)      | (0.8) | (1.2) | (5.2)     | (0.3) | (7.5)      | (5.4)       |
| Model III              |            |       |       |           |       |            |             |
|                        | $d_{\min}$ | r     | z     | $\varphi$ | $r_p$ | $\theta_p$ | $\varphi_p$ |
|                        | (Å)        | (Å)   | (Å)   | (°)       | (Å)   | (°)        | (°)         |
| initial                | 12.3       | 36.5  | 0.0   | 50.0      | 10.6  | 152.3      | 50.0        |
| approach (~580 ps)     | 2.7        | 25.6  | -5.7  | 12.0      | 11.7  | 136.8      | 8.0         |
| encounter (~29 ns)     | 2.7        | 22.7  | -14.4 | -43.3     | 11.4  | 86.0       | -61.9       |
| association (30~100ns) | 2.7        | 22.6  | -12.7 | -36.3     | 11.4  | 89.7       | -52.5       |
|                        | (0.1)      | (0.7) | (2.1) | (5.3)     | (0.3) | (7.5)      | (6.7)       |
| Model VI               |            |       |       |           |       |            |             |
|                        | $d_{\min}$ | r     | z     | $\varphi$ | $r_p$ | $\theta_p$ | $\varphi_p$ |
|                        | (Å)        | (Å)   | (Å)   | (°)       | (Å)   | (°)        | (°)         |
| initial                | 12.9       | 36.5  | 0.0   | 110.0     | 10.6  | 152.3      | 110.0       |
| approach (~420 ps)     | 3.06       | 28.3  | -0.6  | 153.8     | 11.3  | 163.0      | 106.7       |
| encounter (~49 ns)     | 2.5        | 19.6  | -6.3  | 151.3     | 11.0  | 118.8      | 141.1       |

|                         |            |       |       |           |       |            |             |
|-------------------------|------------|-------|-------|-----------|-------|------------|-------------|
| association (50~110 ns) | 2.6        | 19.0  | -6.2  | 151.2     | 10.8  | 124.2      | 139.8       |
|                         | (0.1)      | (0.4) | (1.0) | (3.0)     | (0.3) | (6.1)      | (4.6)       |
| Model V                 |            |       |       |           |       |            |             |
|                         | $d_{\min}$ | r     | z     | $\varphi$ | $r_p$ | $\theta_p$ | $\varphi_p$ |
|                         | (Å)        | (Å)   | (Å)   | (°)       | (Å)   | (°)        | (°)         |
| initial                 | 7.1        | 36.5  | 0.0   | 0.0       | 10.6  | 152.3      | 90.0        |
| approach (~250 ps)      | 4.41       | 32.1  | 4.4   | 42.1      | 11.4  | 128.6      | 123.9       |
| encounter (~ 59 ns)     | 2.6        | 24.2  | 2.1   | -32.2     | 10.7  | 132.5      | 36.4        |
| association (60~100ns)  | 2.6        | 24.1  | 1.5   | -32.4     | 10.8  | 131.1      | 33.6        |
|                         | (0.1)      | (0.4) | (0.8) | (3.6)     | (0.3) | (5.8)      | (4.7)       |
| Model VI                |            |       |       |           |       |            |             |
|                         | $d_{\min}$ | r     | z     | $\varphi$ | $r_p$ | $\theta_p$ | $\varphi_p$ |
|                         | (Å)        | (Å)   | (Å)   | (°)       | (Å)   | (°)        | (°)         |
| initial                 | 9.6        | 36.5  | 0.0   | 0.0       | 10.6  | 152.3      | -90.0       |
| approach (~ 650 ps)     | 2.8        | 35.1  | 1.87  | -30.0     | 12.5  | 144.7      | -122.7      |
| encounter (~40 ns)      | 2.6        | 26.7  | -9.2  | 47.1      | 12.5  | 137.4      | -28.7       |
| association (50~100 ns) | 2.7        | 27.0  | -11.2 | 45.4      | 12.9  | 144.5      | -32.6       |
|                         | (0.1)      | (0.6) | (1.3) | (3.4)     | (1.1) | (6.0)      | (19.6)      |

**Table S1.** The position and orientation of the protein respect to the DNA at the starting point and at the end of each binding stage. For the associating stage, the average and the standard deviation in parenthesis are shown.

## Supplementary Figure legends

**Figure S1.** The total electrostatic binding free energy  $\Delta G_{\text{ele,MD}}$  in variation with  $r$  and  $\varphi$ .

**Figure S2.** Time development of the binding free energy of the complex. Here the entropy term is not shown in the calculation of the total binding free energy.

**Figure S3.** Time development of the position and orientation of the protein with respect to the DNA for Model I.

**Figure S4.** Time development of the position and orientation of the protein with respect to the DNA for Model II.

**Figure S5.** Time development of the position and orientation of the protein with respect to the DNA for Model III.

**Figure S6.** Time development of the position and orientation of the protein with respect to the DNA for Model IV.

**Figure S7.** Time development of the position and orientation of the protein with respect to the DNA for Model V.

**Figure S8.** Time development of the position and orientation of the protein with respect to the DNA for Model VI.

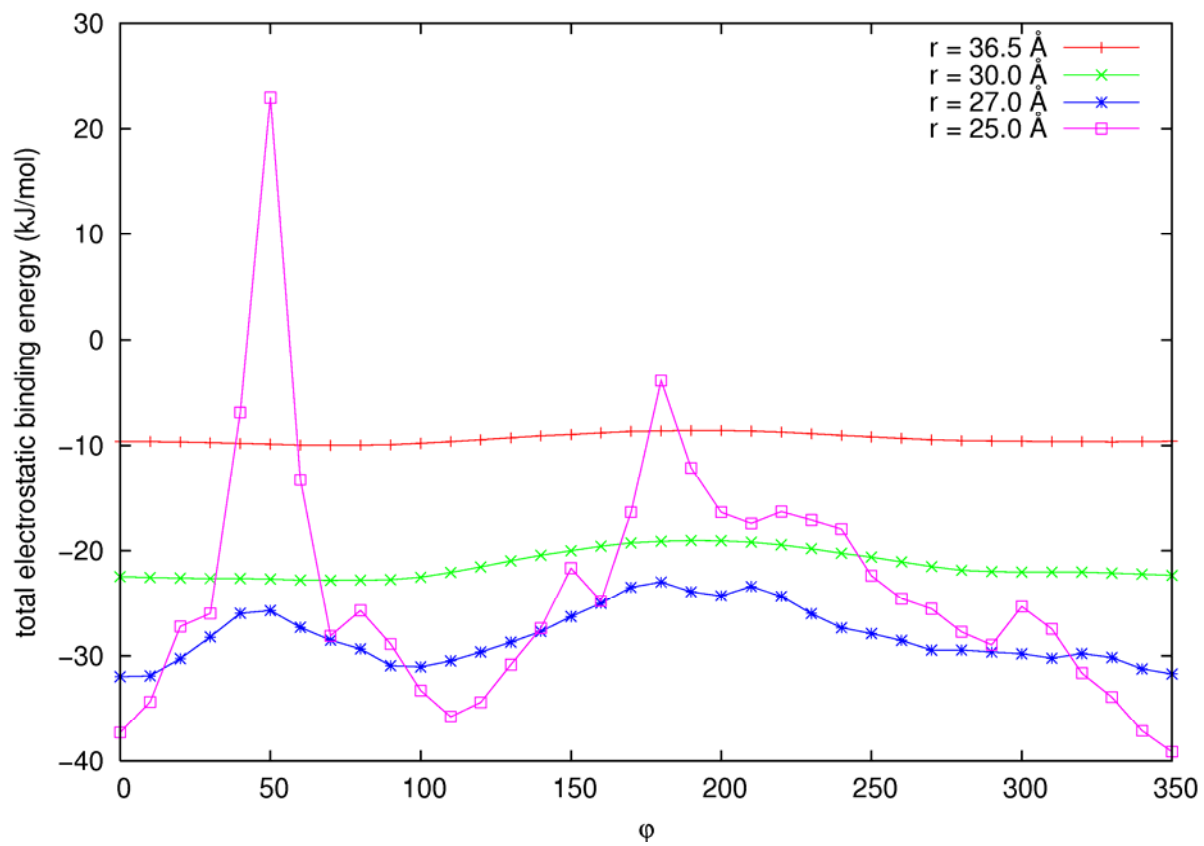

Figure S1

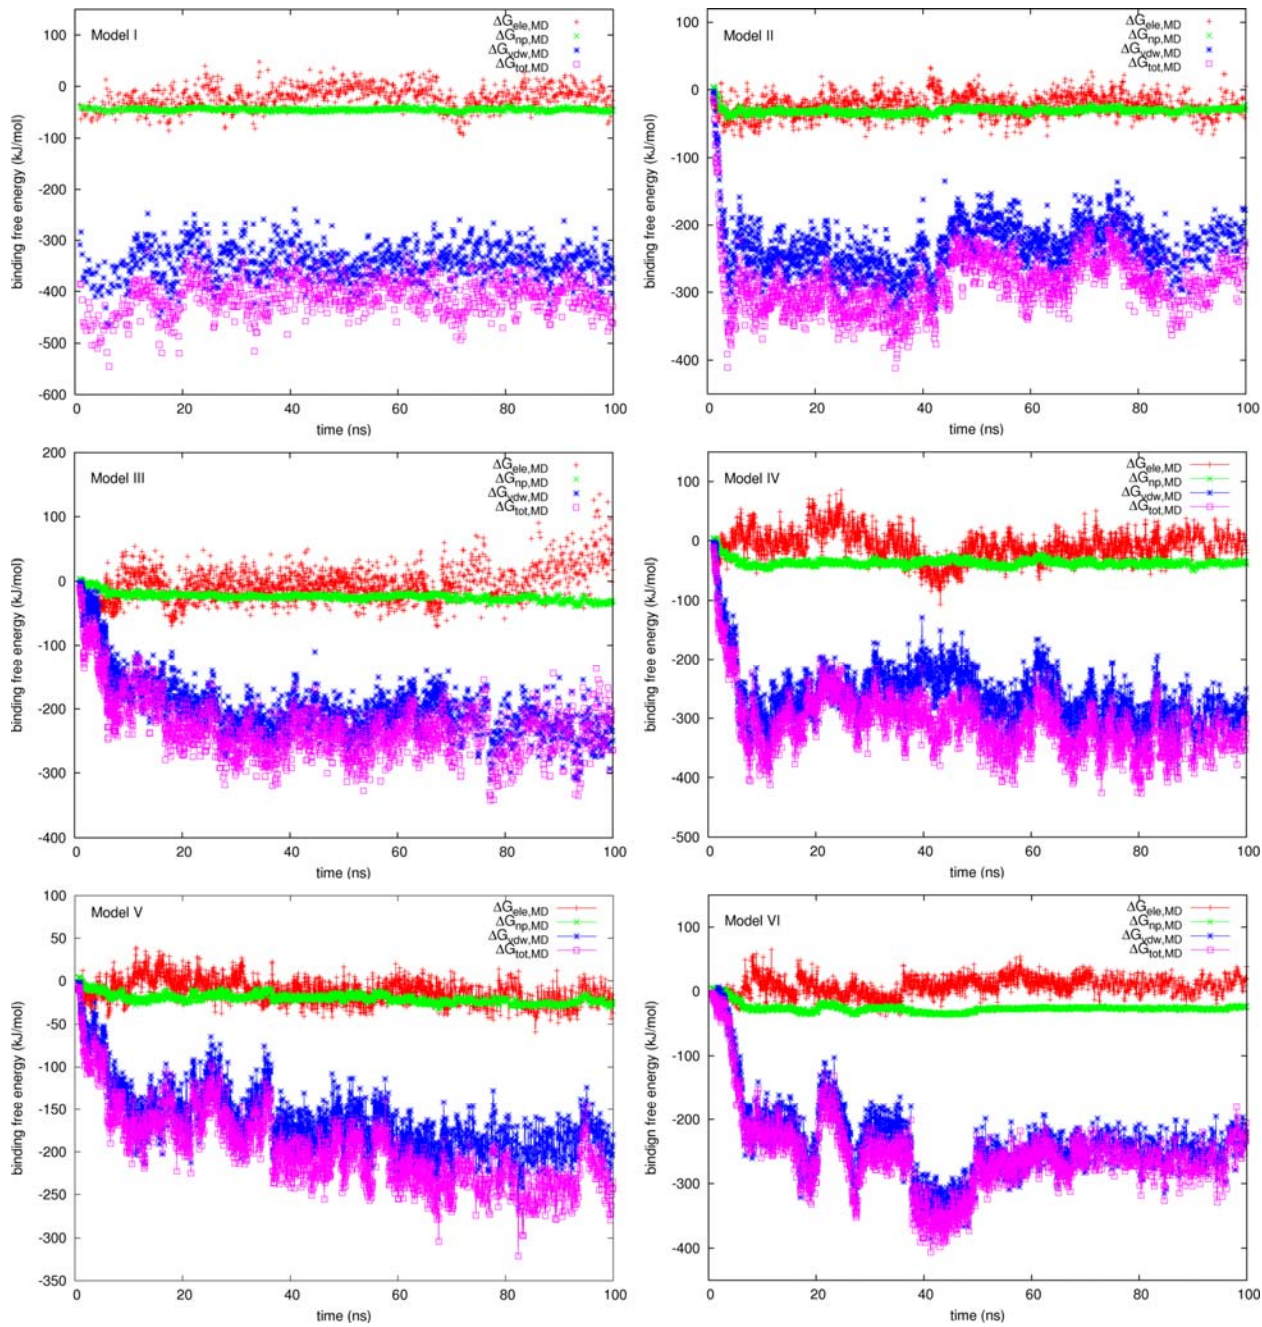

Figure S2

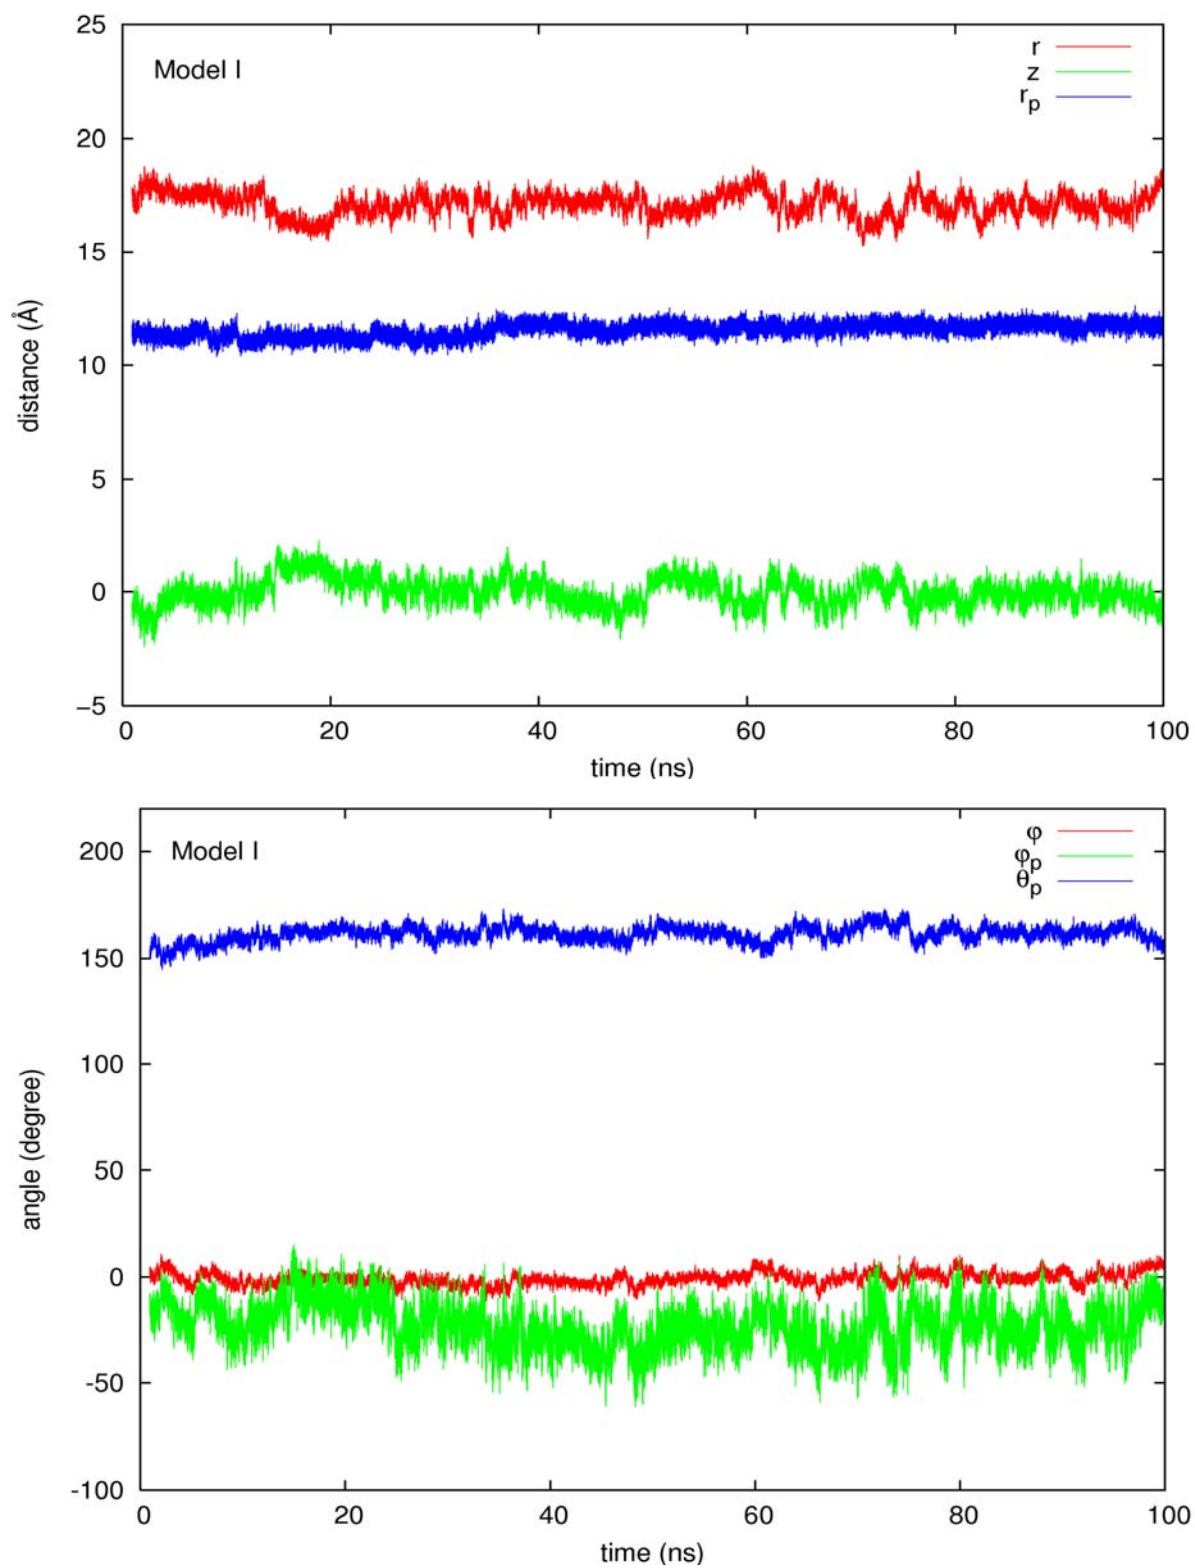

Figure S3



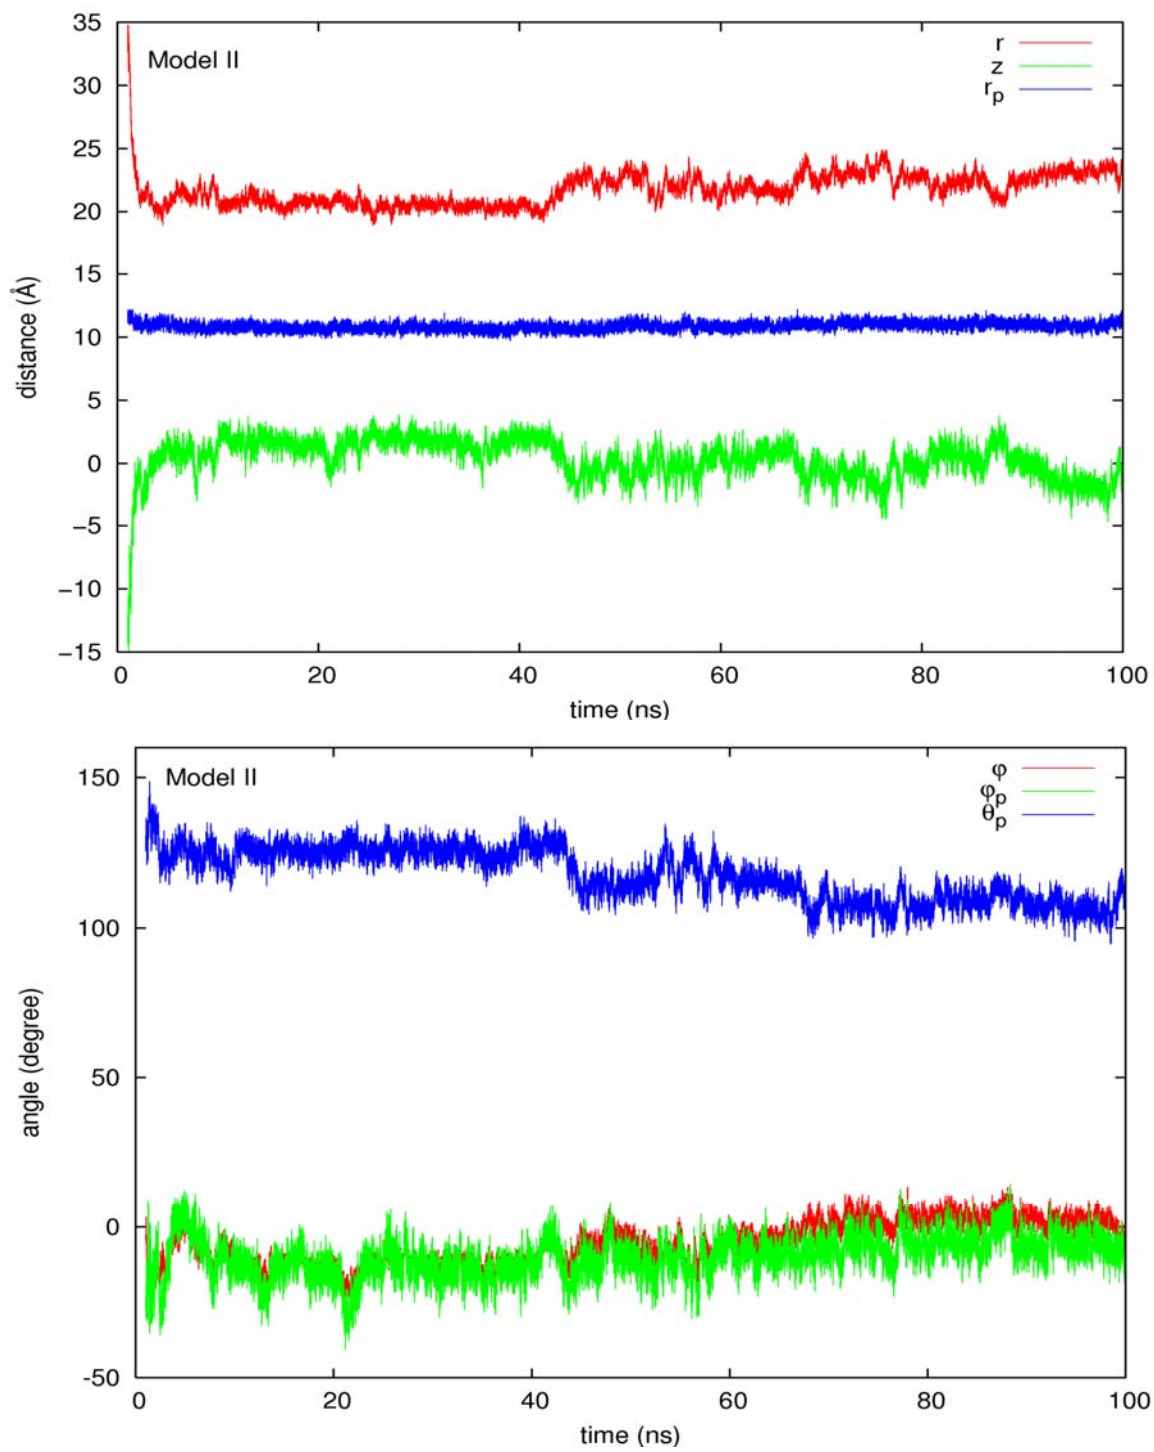

Figure S4

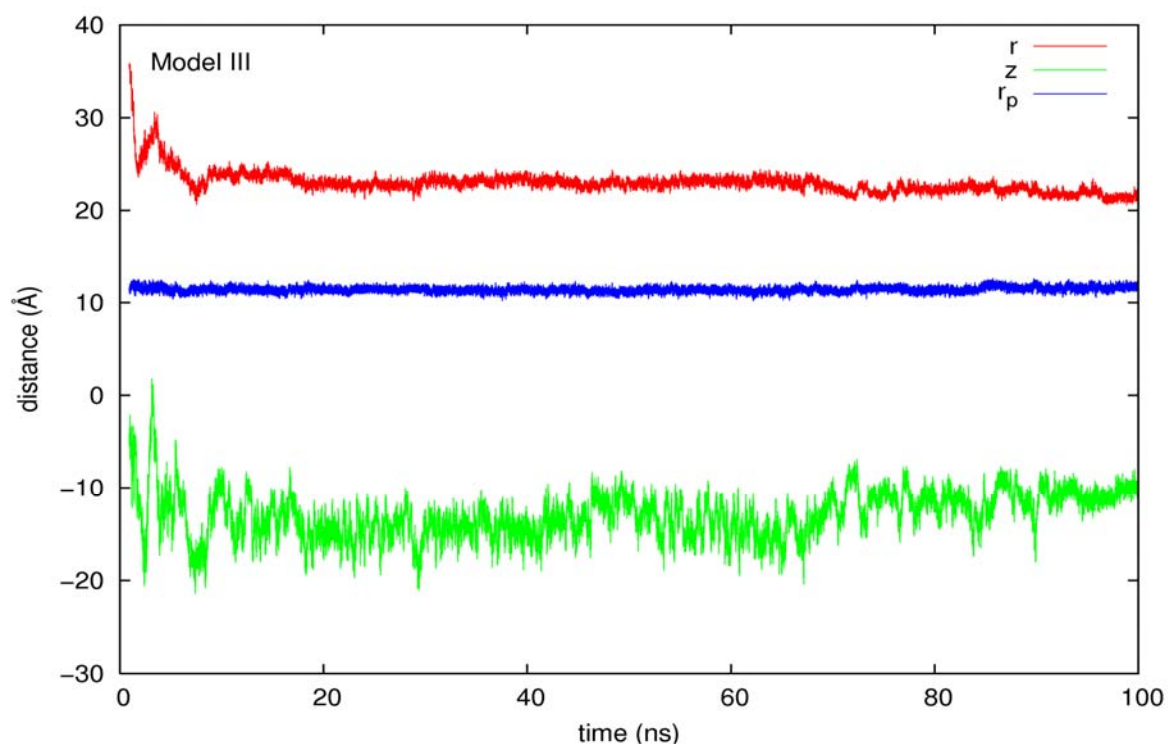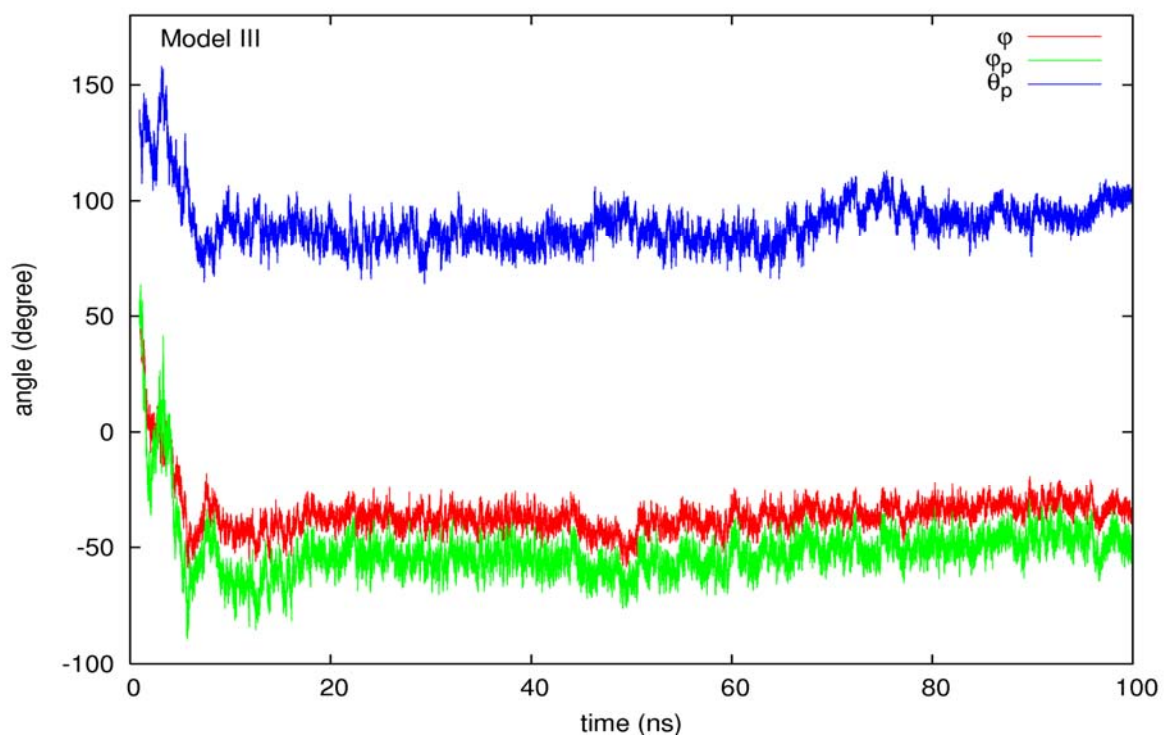

Figure S5

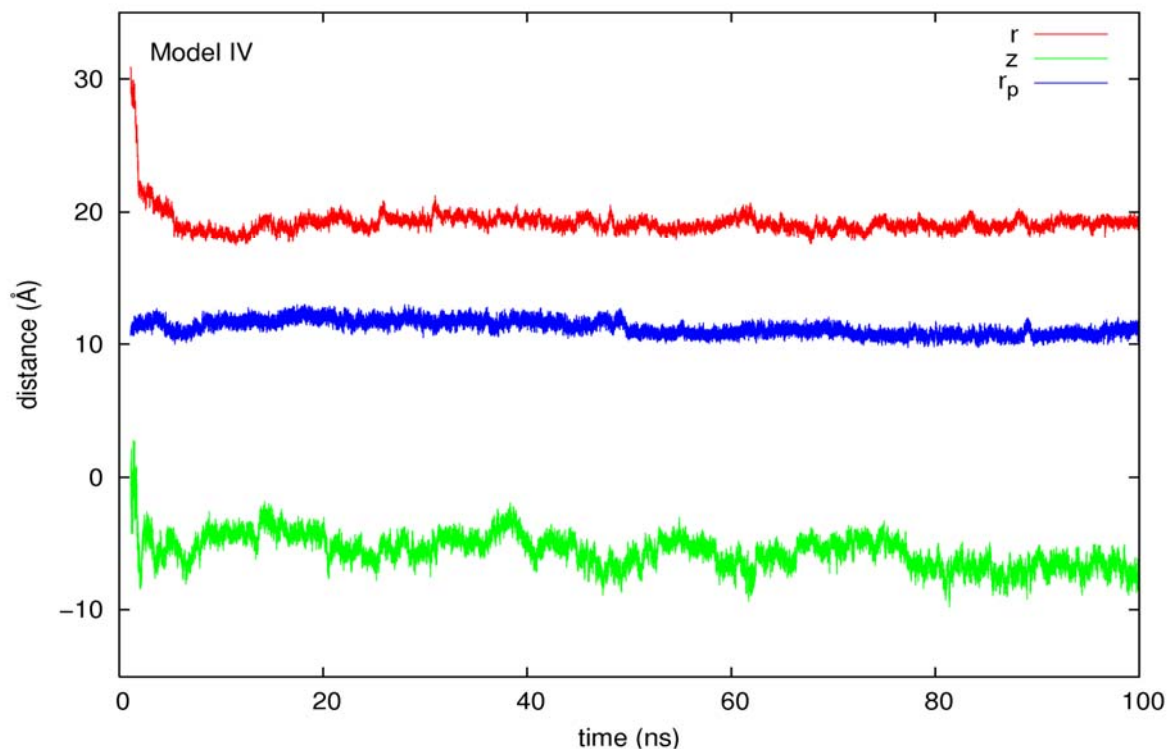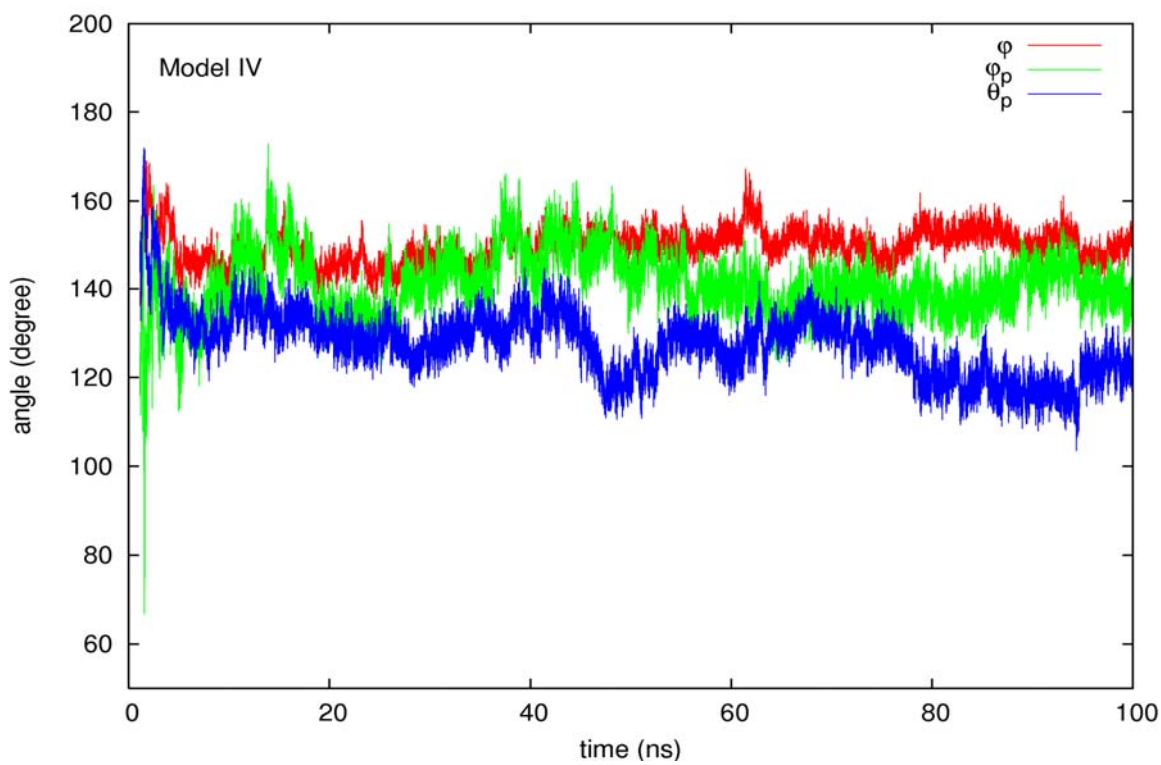

Figure S6

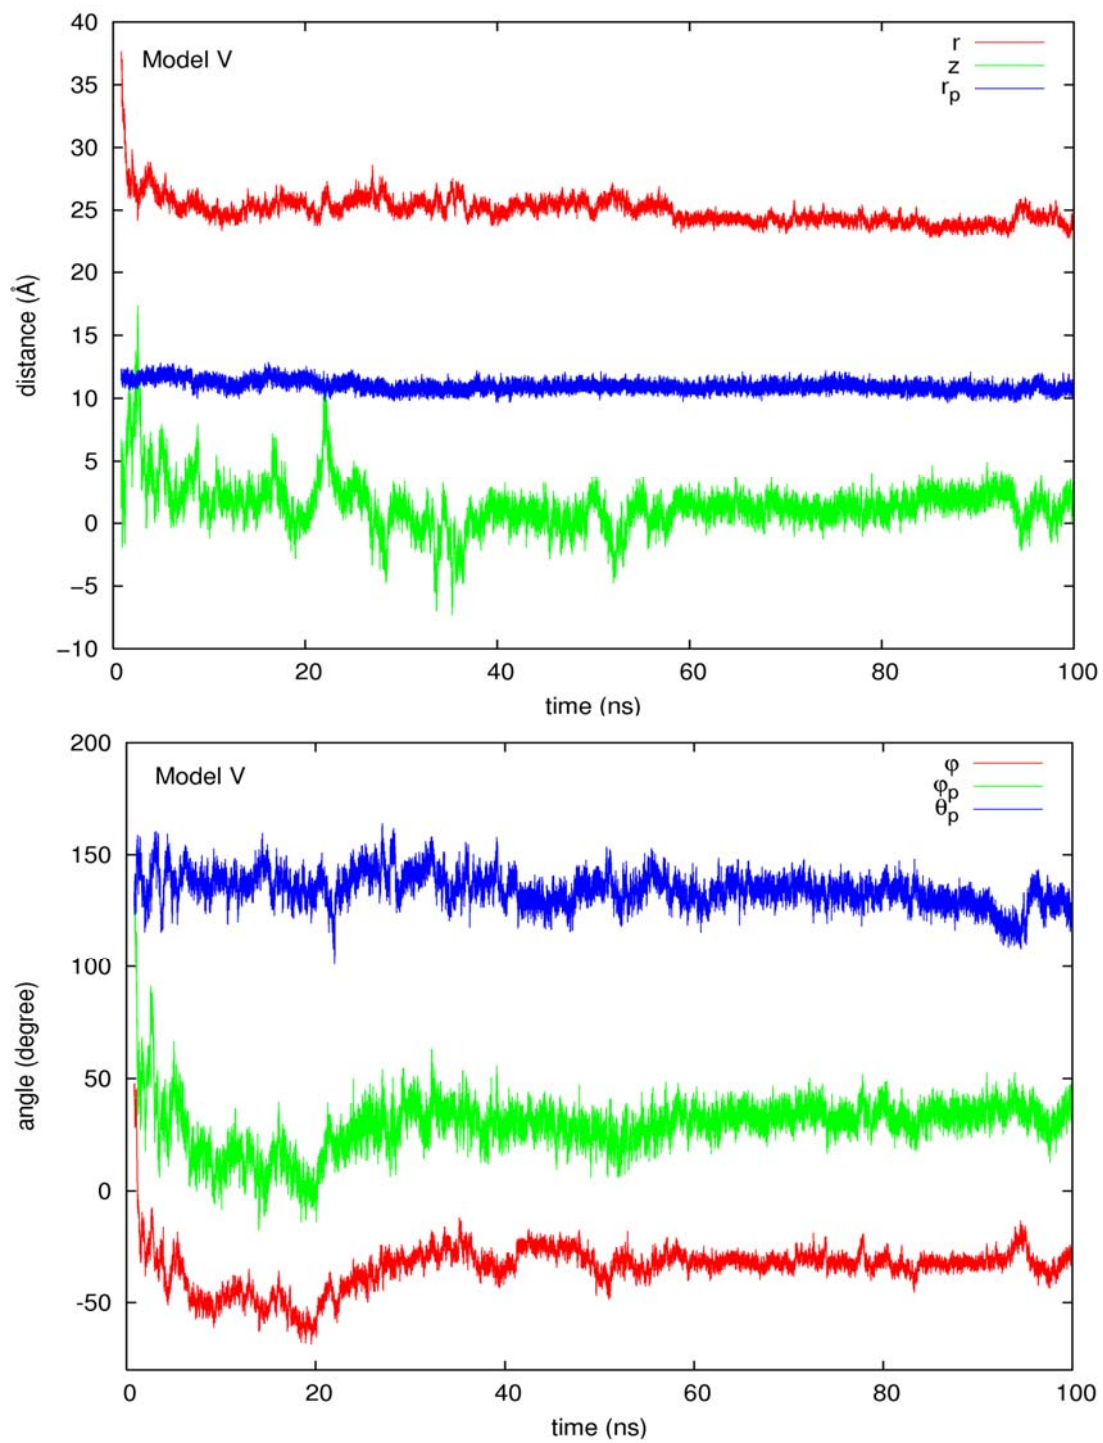

Figure S7

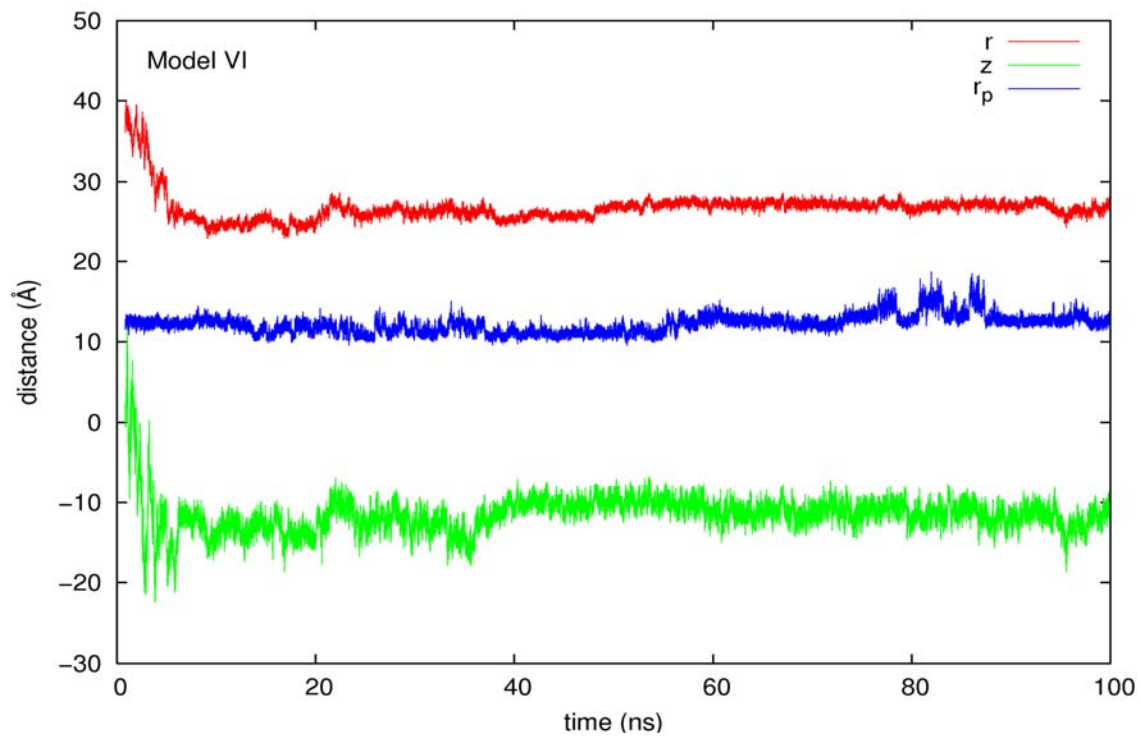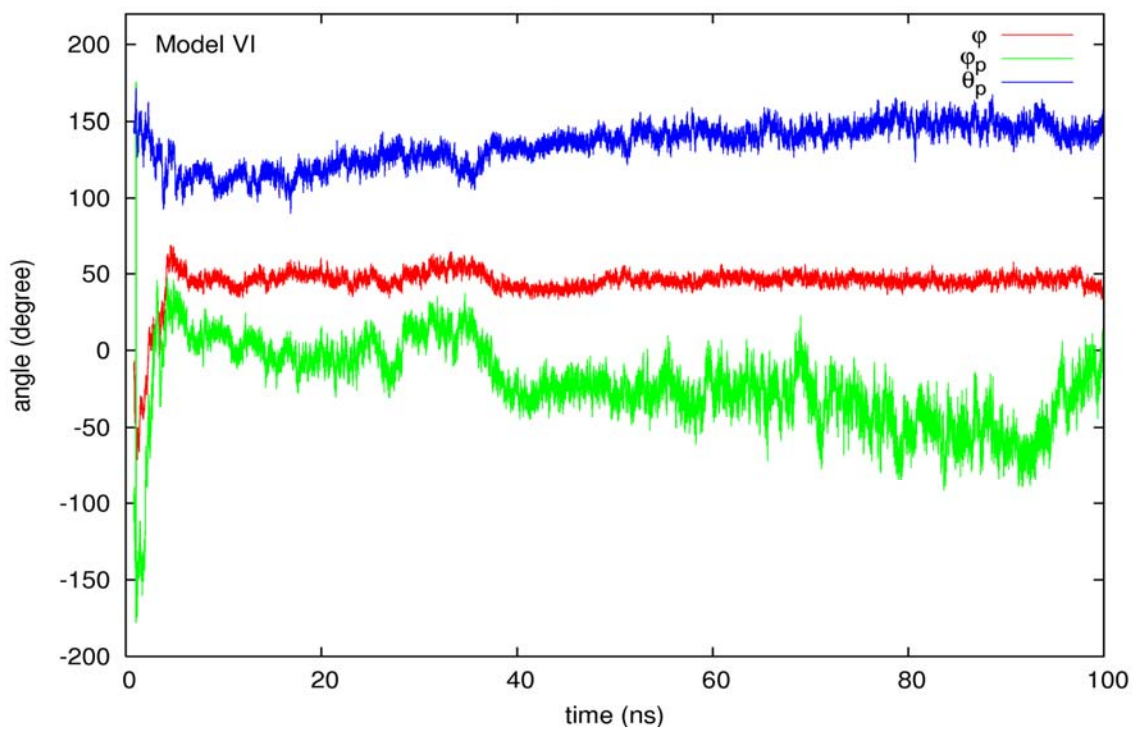

Figure S8
